# Supplementary material for: Preparation of leukotriene B4 inhibitory active 2- and 3-(2-aminothiazol-4-yl)benzo[b]furan derivatives and their growth inhibitory activity on human pancreatic cancer cells
Source: Royal Society of Chemistry journal article supplement (doi:10.1039/b803313g), 2008-01-01
Supplement: b803313g.pdf [file b803313g.pdf]

## Supporting Information

Preparation of leukotriene B<sub>4</sub> inhibitory active 2- and 3-(2-aminothiazol-4-yl)benzo[*b*]furan derivatives and their growth inhibitory activity on human pancreatic cancer cells

**Mari Kuramoto,<sup>a</sup> Yoko Sakata,<sup>a</sup> Kumi Terai,<sup>a</sup> Ikuo Kawasaki,<sup>a</sup> Jun-ichi Kunitomo,<sup>a</sup> Takahiro Ohishi,<sup>b</sup> Takehiko Yokomizo,<sup>c</sup> Seiichi Takeda,<sup>d</sup> Shuichi Tanaka<sup>d</sup> and Yoshitaka Ohishi<sup>\*a</sup>**

*Address*

<sup>a</sup>*School of Pharmaceutical Sciences, Mukogawa Women's University, 11-68, Koshien Kyuban-cho, Nishinomiya 663-8179, Japan. E-mail: ikuo\_k@mukogawa-u.ac.jp; Fax: +798 45 9953; Tel: +798 45 9953*

<sup>b</sup>*Science of Environment and Mathematical Modeling, Graduate School of Engineering, Doshisha University, Kyotanabe, Kyoto 610-0394, Japan*

<sup>c</sup>*Department of Medical Biochemistry, Graduate School of Medical Sciences, Kyushu University, 3-1-1, Maidashi, Higashi-ku, Fukuoka, 812-8582, Japan*

<sup>d</sup>*Fuso Pharmaceutical Industries, Ltd., 2-3-30, Morinomiya, Joto-ku, Osaka, 536-8523, Japan*

**Growth inhibitory activity of 5b, 5c, 5f, 7b, 10a, 12b, 13 and 16 against cancer cells.**

**Table** In vitro cell growth inhibitory activities of **5b, 5c, 5f, 7b, 10a, 12b, 13, 16** and 5-FU<sup>a)</sup>

| Compd.     | MIA PaCa-2     |           | MCF-7          |            | MDA-MB-231     |          | NHDF           |           |
|------------|----------------|-----------|----------------|------------|----------------|----------|----------------|-----------|
|            | Cell viability | % growth  | Cell viability | % growth   | Cell viability | % growth | Cell viability | % growth  |
| <b>5b</b>  | 104.1±0.5      | 104.9±0.6 | 180.7±10.1     | 208.5±13.6 | 92.3±3.6       | 88.4±5.4 | 89.5±2.0       | 87.3±2.5  |
| <b>5c</b>  | 104.8±0.7      | 105.6±0.8 | 150.6±7.9      | 168.1±10.6 | 80.9±2.3       | 71.1±3.5 | 106.9±1.5      | 108.3±1.8 |
| <b>5f</b>  | 107.3±0.8      | 108.6±1.0 | 182.0±8.9      | 210.4±11.9 | 95.0±3.5       | 92.4±5.3 | 93.3±2.4       | 91.9±2.9  |
| <b>7b</b>  | 101.8±0.9      | 102.1±1.0 | 117.9±6.3      | 124.1±0.8  | 93.0±2.8       | 89.4±4.2 | 85.2±1.2       | 82.1±1.5  |
| <b>10a</b> | 82.4±1.9       | 79.3±2.2  | 79.4±2.1       | 72.3±2.9   | 86.7±1.4       | 79.9±2.2 | 87.2±0.9       | 84.5±1.0  |
| <b>12b</b> | 94.5±1.0       | 93.5±1.2  | 124.6±7.6      | 133.0±10.2 | 84.1±2.3       | 75.9±3.5 | 78.6±2.2       | 74.1±2.6  |
| <b>13</b>  | 95.3±1.0       | 94.4±1.2  | 122.8±6.4      | 130.7±8.6  | 92.5±1.6       | 88.7±2.5 | 79.8±1.7       | 75.6±2.1  |
| <b>16</b>  | 91.2±2.4       | 89.7±2.8  | 104.6±3.5      | 106.2±4.7  | 78.8±2.6       | 68.0±3.9 | 87.2±0.9       | 84.5±1.0  |
| 5-FU       | 83.9±1.5       | 81.2±1.8  | 75.9±5.1       | 67.6±6.8   | 72.9±1.7       | 58.9±2.5 | 57.0±1.7       | 48.0±2.0  |

a) Concentration of each compound, 10  $\mu$ M.

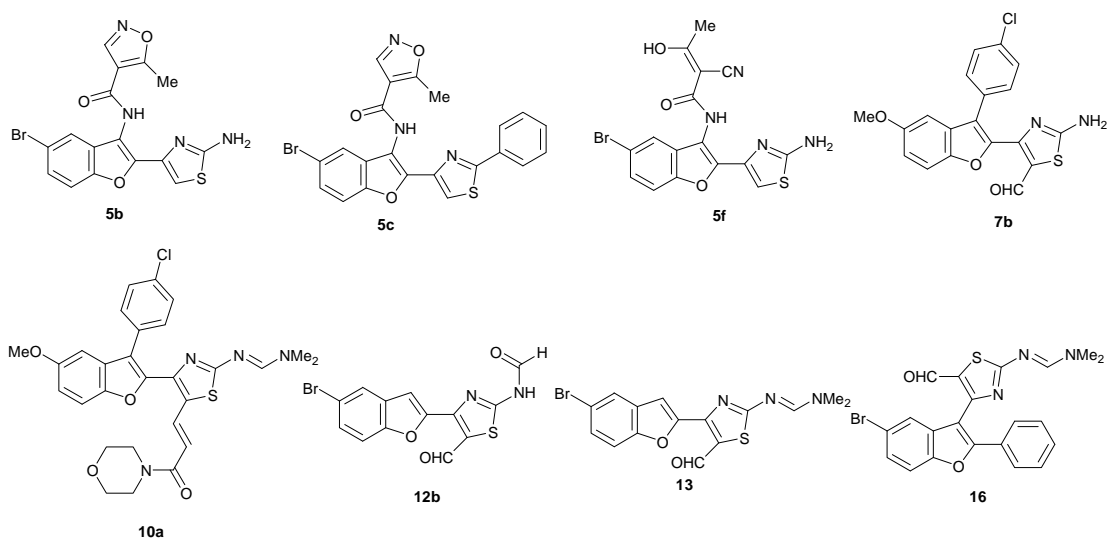

**Fig.** Structures of evaluated benzo[b]furan derivatives
